# Supplementary material for: Novel B55α-PP2A mutations in AML promote AKT T308 phosphorylation and sensitivity to AKT inhibitor-induced growth arrest
Source: PubMed Central journal article supplement (PMC5308637; doi:10.18632/oncotarget.11209), 2016-08-11
Supplement: oncotarget-07-61081-s001.pdf [file oncotarget-07-61081-s001.pdf]

## Novel B55 $\alpha$ -PP2A mutations in AML promote AKT T308 phosphorylation and sensitivity to AKT inhibitor-induced growth arrest

### Supplementary Materials

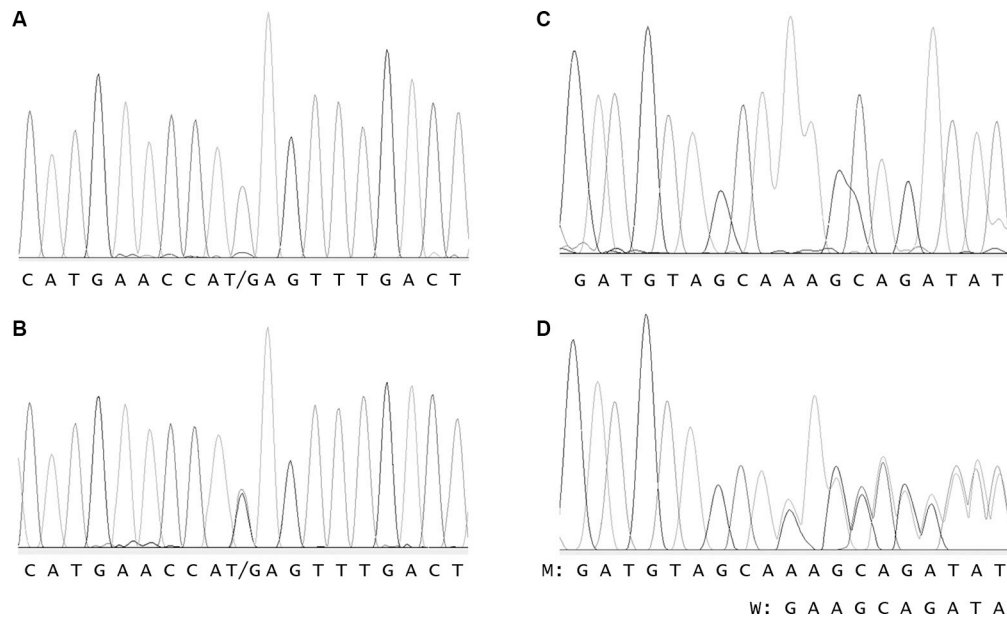

**Supplementary Figure S1: Sequencing histograms from samples of AML blasts.** Demonstration of sequencing histograms from sample 2 mRNA (A), genomic DNA (B), or sample 7 mRNA (C), or genomic DNA (D). A: adenine; C: cytosine; G: guanine; T: thymine; M: mutant allele sequence; W: wild type allele sequence.

| Sample | Score | Predicted Result |                               |
|--------|-------|------------------|-------------------------------|
| 2      | 1     | Deleterious      | All known protein motifs lost |
| 7      | 0.99  | Deleterious      | All known protein motifs lost |
| 10     | 1     | Deleterious      | All known protein motifs lost |

**Supplementary Figure S2: Results from mutation prediction testing.** Table showing the predicted results of the mutations on B55 $\alpha$  function.

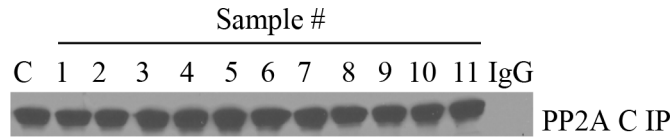

**Supplementary Figure S3: PP2A C subunit IP input for PP2A activity assay.** Western blot showing the amount of PP2A C subunit immunoprecipitated in the *in vitro* PP2A phosphatase activity assay shown in Figure 2B. 2C: control cells.

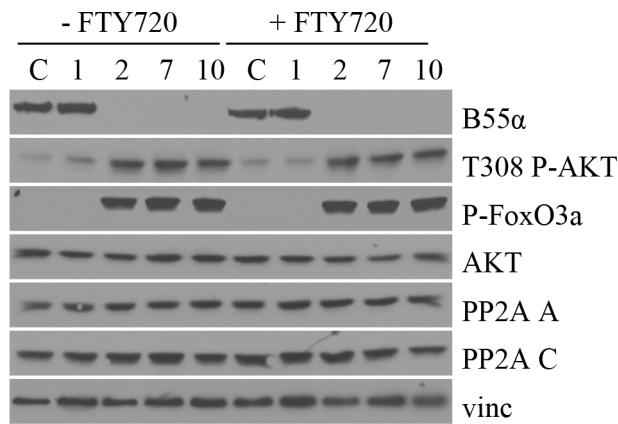

**Supplementary Figure S4: Effect of PP2A activator on leukemic blasts.** Cells were either mock treated (– FTY720) or treated with the PP2A activator FTY720 (+ FTY720), then lysed and subjected to western blotting with the indicated antibody. C: control cells; P-FoxO3A: phosphorylated FoxO3A protein; Vinc: Vinculin.

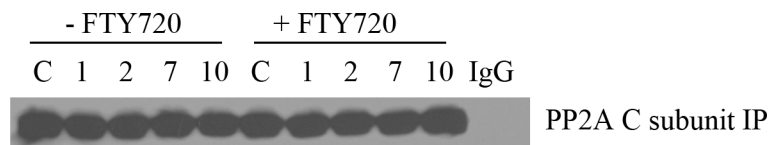

**Supplementary Figure S5: PP2A C subunit IP input for activity assay.** Western blot showing the amount of PP2A C subunit immunoprecipitated in the *in vitro* PP2A phosphatase activity assay shown in Figure 4D.

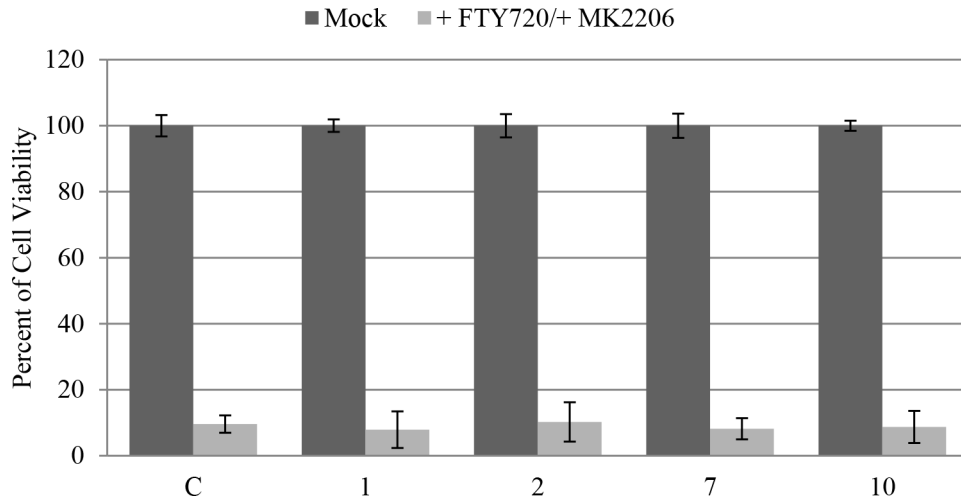

**Supplementary Figure S6: Effect of treatment of leukemic blasts with MK2206 and FTY720.** Cells were either mock treated (mock) or treated simultaneously with FTY720 and MK2206 (+ FTY720/+ MK2206) then subjected to MTT cell viability assay. Cell viabilities were reported as a percent of the mock treated viability. Bars represent average of triplicate experiments  $\pm$  standard deviation.

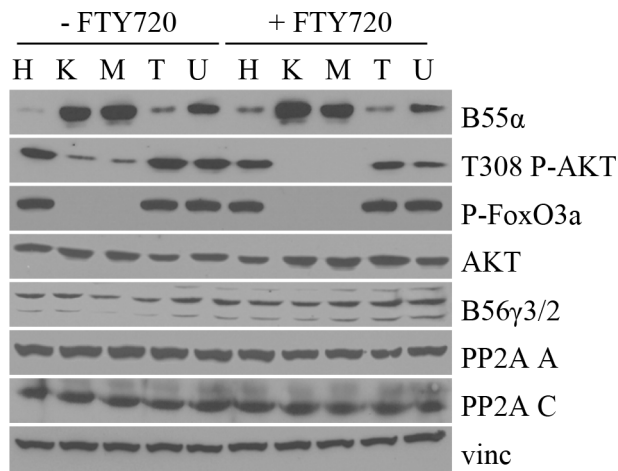

**Supplementary Figure S7: Effect of PP2A activator on leukemia cell lines.** Cultured cells were either mock treated (- FTY720) or treated with the PP2A activator FTY720 (+ FTY720), then lysed and subjected to western blotting with the indicated antibody. P-FoxO3A: phosphorylated FoxO3A protein; H: HL60; K: K562; M: MOLM14; T: THP1; U: U937; Vinc: Vinculin.

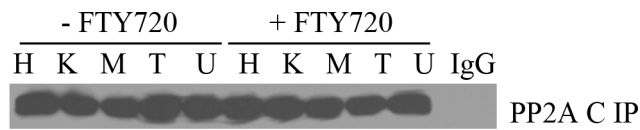

**Supplementary Figure S8: PP2A C subunit IP input for PP2A activity assay.** Western blot showing the amount of PP2A C subunit immunoprecipitated in the *in vitro* PP2A phosphatase activity assay shown in Figure 5D. H: HL60; K: K562; M: MOLM14; T: THP1; U: U937.

| Sample # | Age | Sex | Race             | AML Type  | Blast Count | Immunophenotype                                             | Mutation         |
|----------|-----|-----|------------------|-----------|-------------|-------------------------------------------------------------|------------------|
| 1        | 59  | M   | Caucasian        | M5a       | 183.78 K    | cd2, cd11b, cd11c, cd13, cd33, cd36, cd38, cd45, cd56, cd64 | 3 copies of RARA |
| 2        | 23  | F   | Caucasian        | M1        | 26.78 K     | cd7, cd13, cd33, cd34, cd45, cd71, cd117, hla-dr, mpo       | FLT3 ITD, NPM1   |
| 3        | 92  | F   | Caucasian        | MDS -> M1 | 89.6 K      | unknown                                                     | unknown          |
| 4        | 66  | M   | Hispanic         | M1        | 137.27 K    | cd7, cd13, cd33, cd38, cd43, cd45, cd117, hla-dr            | FLT3 ITD, NPM1   |
| 5        | 56  | F   | Caucasian        | M3        | 102.47 K    | cd9, cd13, cd33, cd34, mpo                                  | negative         |
| 6        | 51  | F   | Hispanic         | M5b       | 82.07 K     | NSE, sudan black, MPO                                       | unknown          |
| 7        | 65  | M   | Caucasian        | NOS       | 202.0 K     | cd7, cd13, cd33, cd34, cd45, cd71, cd117, HLA-DR            | NPM1             |
| 8        | 45  | F   | Caucasian        | M0 vs M2  | 113.65 K    | cd7, cd9, cd13, cd34, cd38, cd45, cd117, HLA-DR             | unknown          |
| 9        | 34  | M   | Hispanic         | M0 vs M1  | 29.36 K     | cd13, cd33, cd34, cd38, cd45, cd117, HLA-DR, TDT            | negative         |
| 10       | 30  | F   | Hispanic         | M1        | 102.85 K    | cd7, cd13, cd33, cd34, cd45, cd71, cd117, HLA-DR, MPO       | FLT3 ITD, NPM1   |
| 11       | 61  | F   | African American | NOS       | 219.49 K    | unknown                                                     | unknown          |

**Supplementary Figure S9: Table of patient data.** Blast counts are in cells per micro liter. F: Female; K: thousand; M: Male.
